# Supplementary material
Source: Springer Nature journal article supplement (https://www.springermedizin.de/resource/supplementary/12936_2014_3239_MOESM3_ESM.pdf/9545414)

Mean temperature

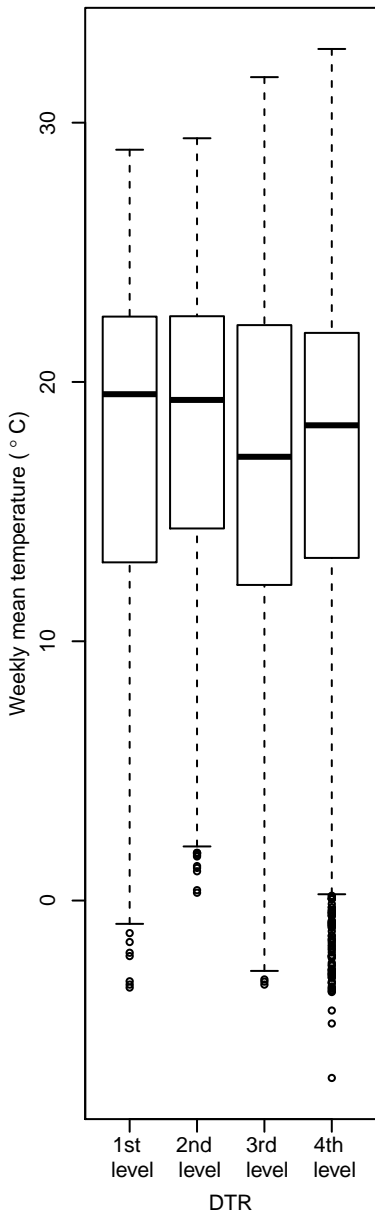

Rainfall

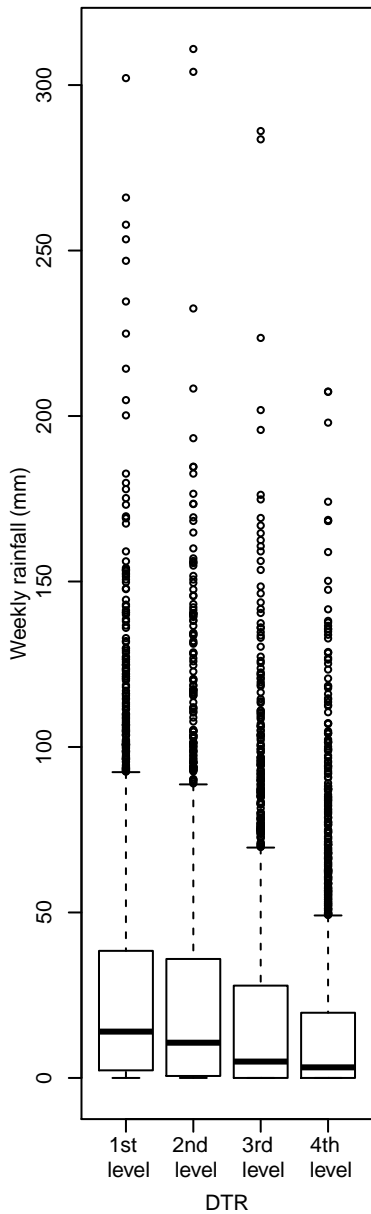

Relative humidity

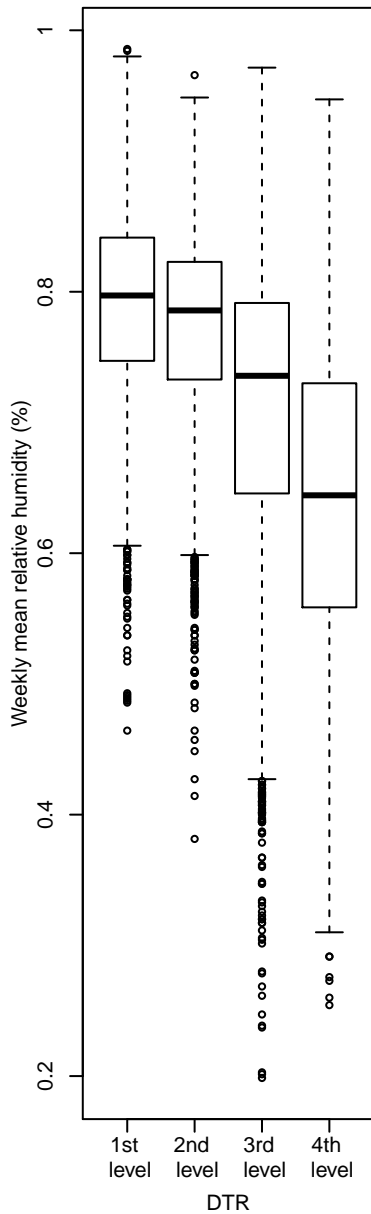

Supplement: MOESM3 [file 9545414]
